# Supplementary material
Source: publisher site journal article supplement (https://www.dovepress.com/get_supplementary_file.php?f=483849.docx)
Supplement: Supplementary file 1 [file get_supplementary_file.php]

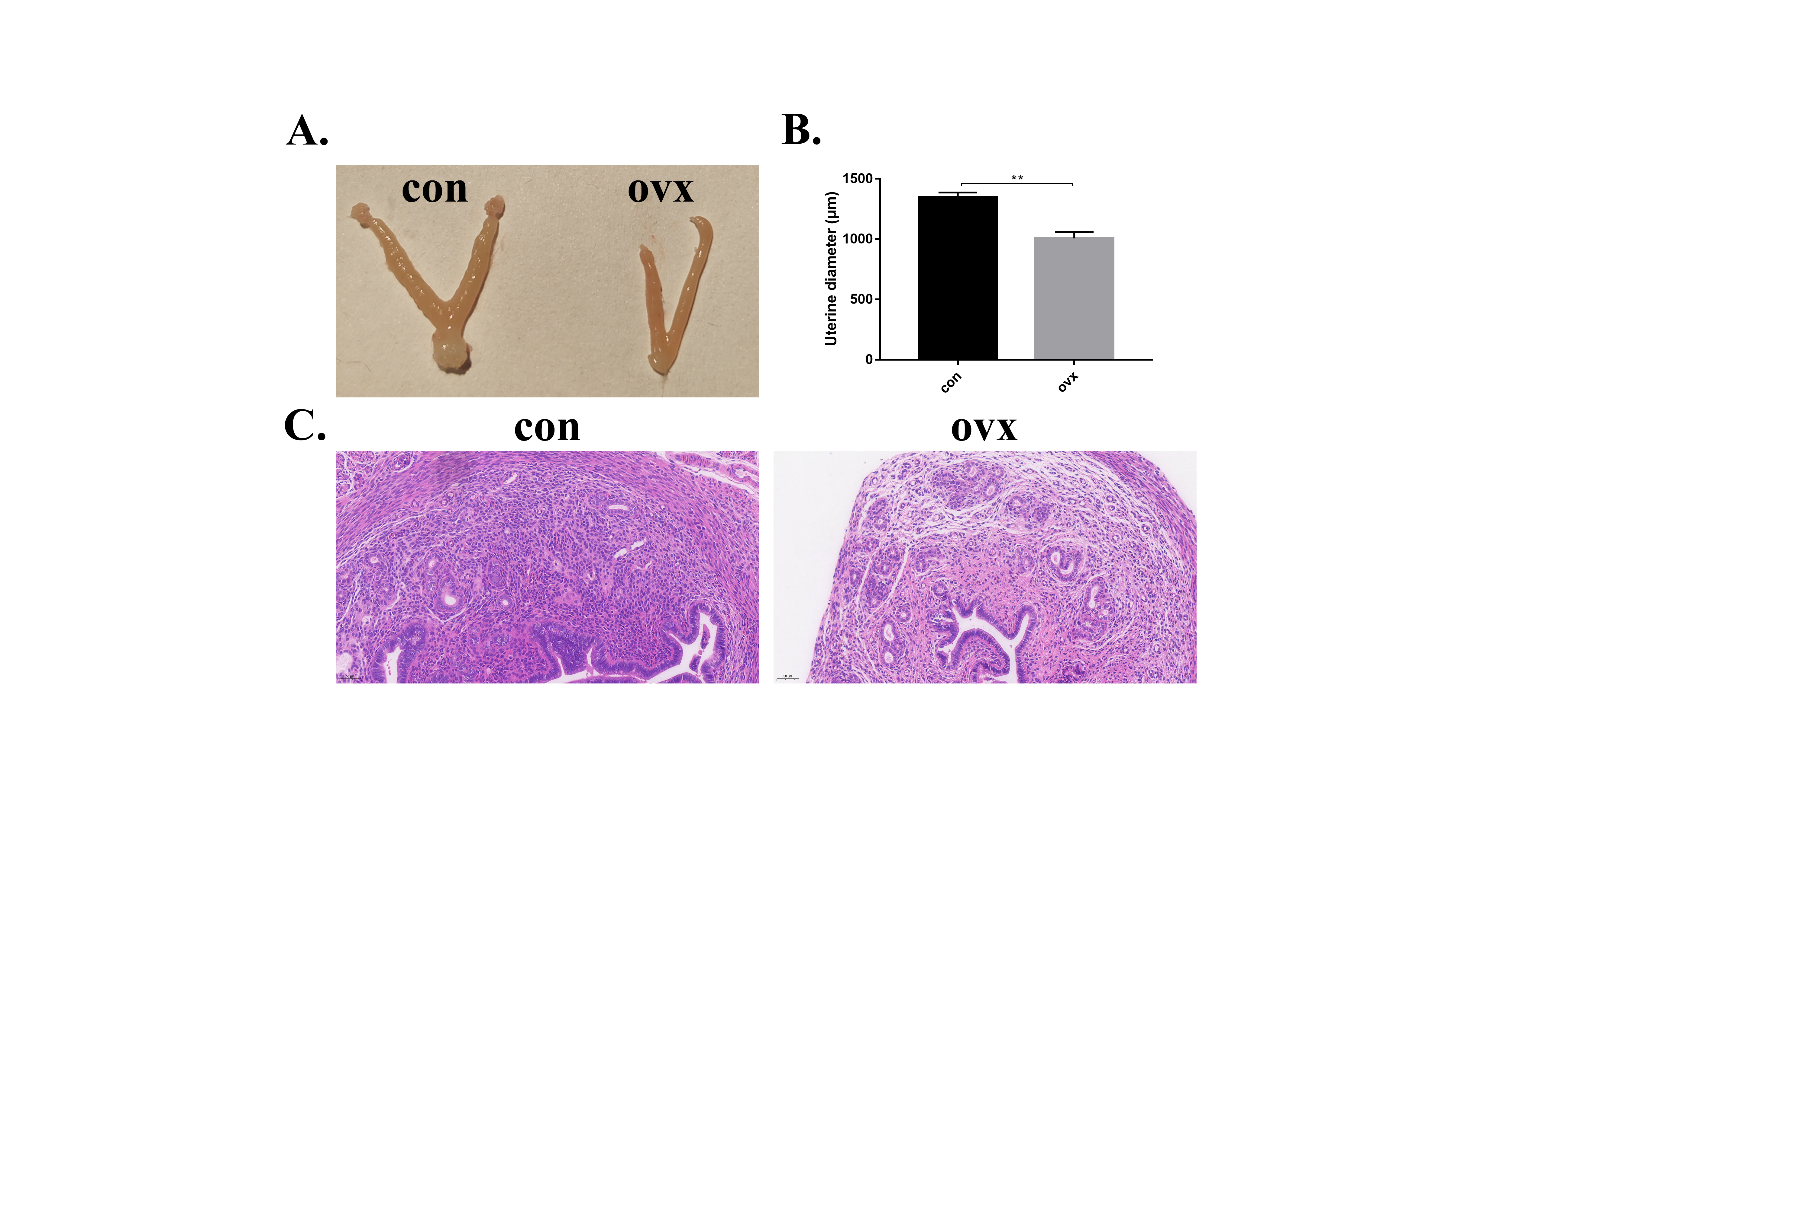


**Fig S1. Ovariectomy in mice induces uterine atrophy. A.** The morphology of the uterus. **B.** The diameter of the uterus. **C.** HE staining of the uterus.


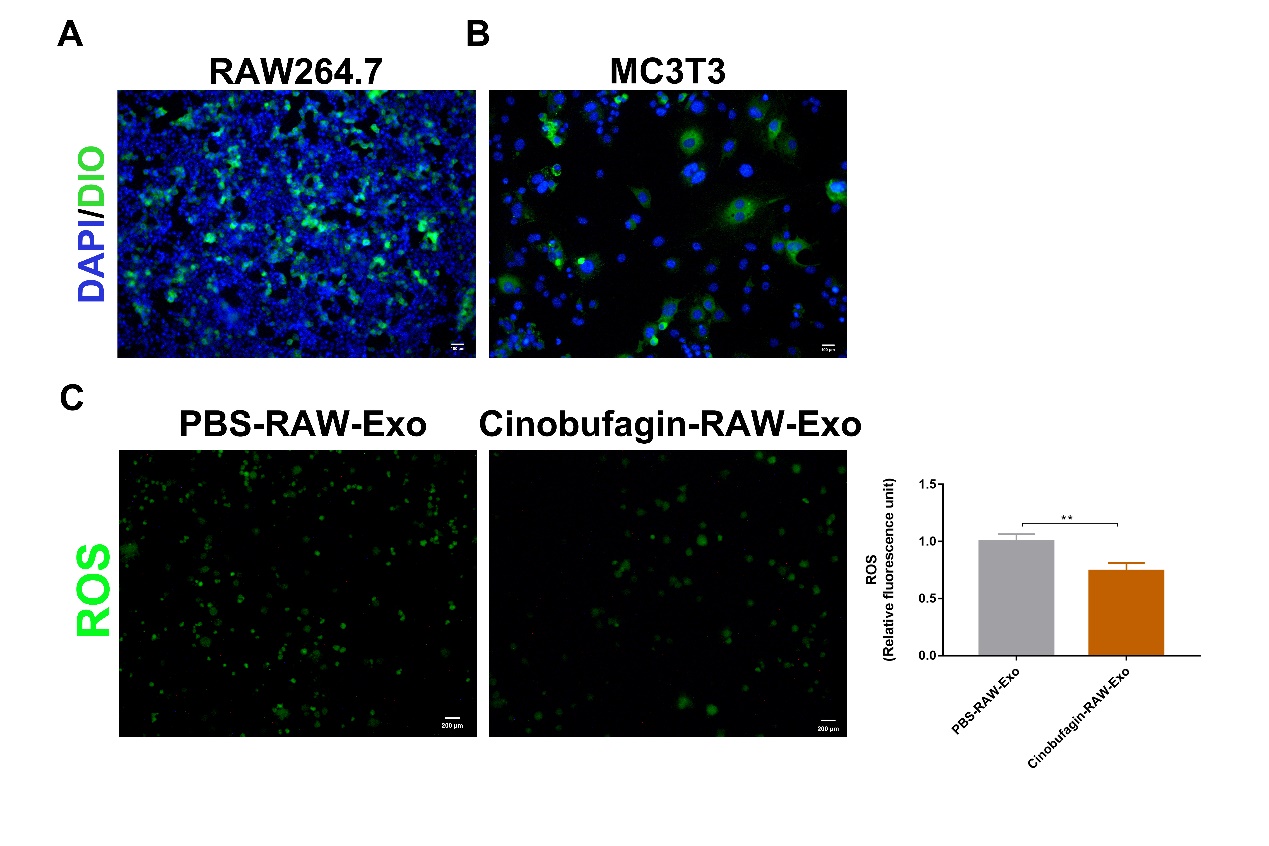


**Fig S2. RAW-Exos inhibit cellular reactive oxygen species levels. A.** Uptake of RAW-Exos by RAW264.7 cells. Green fluorescence indicates the presence of RAW-Exos. **B.** Uptake of RAW-Exos by MC3T3 cells. Green fluorescence indicates the presence of RAW-Exos. **C.** Intracellular levels of reactive oxygen species (ROS). N=3.


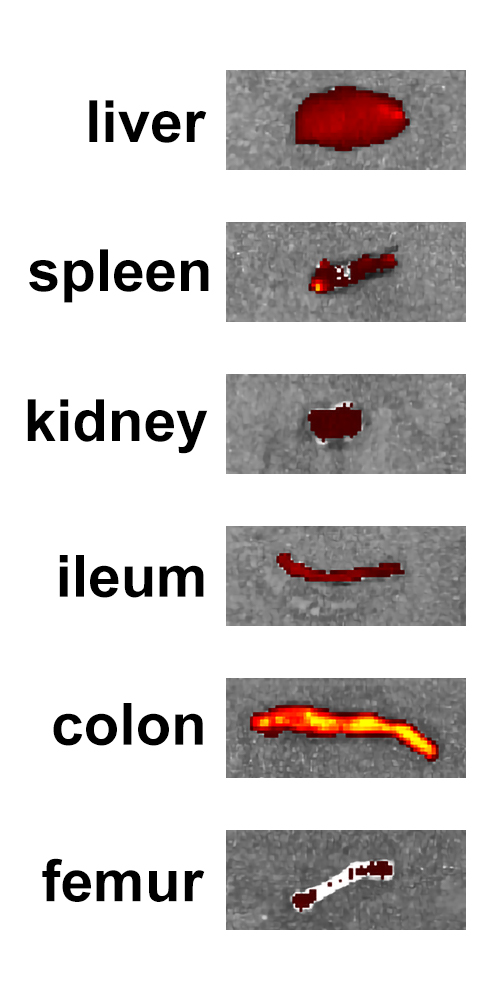


**Fig S3. Tracking RAW-Exos in vivo for 24 hours.**
